# Supplementary material for: Inconsistency in Shoulder Arthrometers for Measuring Glenohumeral Joint Laxity: A Systematic Review
Source: MDPI journal article supplement (doi:10.3390/bioengineering10070799), 2023-07-04
Supplement: s1 [file s1]

**Table S1.** Database search strategy.

| Database       | Results     | Search strategy                                                                                                                                                                              | Date       |
|----------------|-------------|----------------------------------------------------------------------------------------------------------------------------------------------------------------------------------------------|------------|
| PubMed         | 667         | (shoulder OR glenohumeral OR glenoid) AND (arthrometer OR telos OR KT1000 OR KT2000 OR donjoi OR laxometer OR laxity)                                                                        | 03/03/2023 |
| EMBASE         | 1149        | ('shoulder'/exp OR shoulder OR glenohumeral OR 'glenoid'/exp OR glenoid) AND ('arthrometer'/exp OR arthrometer OR 'telos'/exp OR telos OR kt1000 OR kt2000 OR donjoi OR laxometer OR laxity) | 03/03/2023 |
| Web of Science | 798         | (shoulder OR glenohumeral OR glenoid) AND (arthrometer OR telos OR KT1000 OR KT2000 OR donjoi OR laxometer OR laxity) (All Fields)"                                                          | 03/03/2023 |
| <b>Total</b>   | <b>2614</b> |                                                                                                                                                                                              |            |

**Table S2.** Risk of bias criteria defined according to Risk of Bias Assessment tool for Non-randomized Studies (RoBANS) tool.

| Domain                             | Description                                                                                                                                                                                                                                                                                                                                                                                                                                                                                                                                                                                                                                                                                                                                                                                                                                                                                                                                                                                                                                                      |
|------------------------------------|------------------------------------------------------------------------------------------------------------------------------------------------------------------------------------------------------------------------------------------------------------------------------------------------------------------------------------------------------------------------------------------------------------------------------------------------------------------------------------------------------------------------------------------------------------------------------------------------------------------------------------------------------------------------------------------------------------------------------------------------------------------------------------------------------------------------------------------------------------------------------------------------------------------------------------------------------------------------------------------------------------------------------------------------------------------|
| <b>Selection of participants</b>   | <p><b>Selection bias</b> caused by inadequate selection of participants.</p> <p>Selection of individuals (regardless of the level of physical activity) with or without symptomatic shoulders.</p> <p>Selection of healthy individuals (athletes or non-athletes) should comprise of those with asymptomatic shoulders and without history of any known shoulder injury or shoulder symptoms (e.g., pain or disability).</p> <p>Selection of injured individuals (athletes or non-athletes) should comprise of those with symptomatic shoulders, with a known and diagnosed injured that can affect shoulder joint laxity, including history of shoulder dislocation (either traumatic or non-traumatic) and complaints of shoulder instability (anterior, posterior, inferior or multidirectional). Other shoulder injuries may be considered, but not compulsory, such as labral tears, Bankart or Hill-Sachs lesions. Selection of injured individuals could also be made by enrolling a population that was submitted to shoulder stabilization surgery.</p> |
| <b>Confounding variables</b>       | <p><b>Selection bias</b> caused by inadequate confirmation and consideration of confounding variables.</p> <p>As confounding variables, we consider: level of sports participation (athletes vs non-athletes); age differences; sex discrepancies (males vs females); and shoulder dominance. When including a single group, the age and sex intra-group discrepancies are not considered. If including a control group with the contralateral shoulder, this control group should be comprised by a homogenous and comparable sample.</p>                                                                                                                                                                                                                                                                                                                                                                                                                                                                                                                       |
| <b>Exposure measurement</b>        | <p><b>Performance bias</b> caused by inadequate measurement of exposure.</p> <p>Laxity measurement should be made through the calculation of shoulder bone displacement (usually combined imaging assessment) to measure the precise joint laxity. Shoulder positioning (rotation and abduction) should be reported or shown to allow comparable results.</p> <p>Stiffness measurement should be made through the computation of force-displacement curves. To calculate stiffness, the arthrometer must allow the application of progressive (controlled) load and record the shoulder movement for each load increment. An imaging control would be preferable to measure stiffness, but it was not be compulsory.</p>                                                                                                                                                                                                                                                                                                                                         |
| <b>Blinding outcome assessment</b> | <p><b>Detection bias</b> caused by inadequate blinding of outcome assessment.</p> <p>Evaluator and/or data analyst not blinded to group or participant conditioning during the exam with the arthrometer or when making the measurement in the imaging exams.</p>                                                                                                                                                                                                                                                                                                                                                                                                                                                                                                                                                                                                                                                                                                                                                                                                |
| <b>Incomplete outcome data</b>     | <p><b>Attrition bias</b> caused by inadequate handling of incomplete data outcome.</p> <p>Missing data or loss to follow-up in &gt;5% of outcome variables.</p>                                                                                                                                                                                                                                                                                                                                                                                                                                                                                                                                                                                                                                                                                                                                                                                                                                                                                                  |

---

|                                    |                                                                                                                                                                                                                                                                                                  |
|------------------------------------|--------------------------------------------------------------------------------------------------------------------------------------------------------------------------------------------------------------------------------------------------------------------------------------------------|
| <b>Selective outcome reporting</b> | <b>Reporting bias</b> caused by selective outcome reporting.<br><br>Because included studies are not traditional clinical trials, an a priori protocol registry is not expected. Reporting bias will be judged based on the reporting of the collected/assessed outcomes at methods and results. |
|------------------------------------|--------------------------------------------------------------------------------------------------------------------------------------------------------------------------------------------------------------------------------------------------------------------------------------------------|

---

**Table S3.** Population characteristics of included studies.

| Reference                            | Country | K<br>(population)   | N<br>(shoulders)    | Sex (M/F)             | Age, M ± SD [range], yrs                                 | Weight, M±SD<br>(Kg)                       | Height, M±SD<br>(cm)                        | Characteristics of<br>population                                                                                                     |
|--------------------------------------|---------|---------------------|---------------------|-----------------------|----------------------------------------------------------|--------------------------------------------|---------------------------------------------|--------------------------------------------------------------------------------------------------------------------------------------|
| Azarsa et al. (2021)<br>[19]         | Iran    | 20                  | 20                  | 20/0                  | 37 ± 7.47 [27-55]                                        | 81.35 ± 6.99                               | 175.25 ± 0.08                               | Volunteer individuals<br>(asymptomatic<br>shoulders).                                                                                |
| Borsa et al. (1999) [20]             | USA     | 20                  | 40                  | 10/10                 | 25.1 ± 5.5                                               | NR                                         | NR                                          | Physically active<br>volunteer individuals<br>(asymptomatic<br>shoulders).                                                           |
| Borsa et al. (2000) [21]             | USA     | 51                  | 102                 | 24/27                 | Male: 22.1 ± 2.5<br>Female: 22.4 ± 3.1                   | Male: 78.7 ± 11.1<br>Female: 63.0 ±<br>7.5 | Male: 177.7 ± 9.6<br>Female: 165.7 ±<br>8.0 | Physically active<br>volunteer individuals<br>(asymptomatic<br>shoulders).                                                           |
| Borsa et al. (2001,2002)<br>[22, 23] | USA     | 20                  | 20                  | 9/11                  | 20.9 ± 3.6                                               | NR                                         | NR                                          | Volunteer individuals<br>(asymptomatic<br>shoulders).                                                                                |
| Borsa et al. (2005)a [24]            | USA     | 43                  | 86                  | NR                    | 25.1 ± 3.3                                               | 96.8 ± 10.1                                | 188.2 ± 6.1                                 | Professional baseball<br>pitchers (major and<br>minor league pitchers)<br>with asymptomatic<br>shoulder and no<br>history of surgery |
| Borsa et al. (2005)b*<br>[25]        | USA     | Experiment<br>1: 20 | Experiment<br>1: 20 | Experiment 1:<br>11/9 | Experiment 1: 22.9 ± 3.3<br><br>Experiment 2: 22.9 ± 3.4 | Experiment 1:<br>70.7 ± 11.5               | Experiment 1:<br>172.6 ± 12.3               | Healthy individuals<br>with asymptomatic<br>shoulder                                                                                 |
|                                      |         | Experiment<br>2: 13 | Experiment<br>2: 13 | Experiment 2:<br>10/3 |                                                          | Experiment 2:<br>75.2 ± 15.5               | Experiment 2:<br>175.5 ± 14.2               |                                                                                                                                      |
| Borsa et al. (2005)c [26]            | USA     | Group I: 42         | Group I: 84         | Group I: 26/16        | Group I: 19.4 ± 1.6 (male);<br>19.7 ± 1.0 (female)       | Group I: 82.3 ±<br>6.2 (male); 65.5 ±      | Group I: 187.9 ±<br>6.6 (male); 170 ±       | Group I: NCAA<br>Division I                                                                                                          |
|                                      |         | Group II: 44        | Group II: 88        | Group II: 26/18       |                                                          | 4.5 (female)                               | 7.2 (female)                                |                                                                                                                                      |

|                                   |     |                                 |                                 |                                     |                                                     |                                                         |                                                          |                                                                                                                                                                                                                                                                                                     |
|-----------------------------------|-----|---------------------------------|---------------------------------|-------------------------------------|-----------------------------------------------------|---------------------------------------------------------|----------------------------------------------------------|-----------------------------------------------------------------------------------------------------------------------------------------------------------------------------------------------------------------------------------------------------------------------------------------------------|
|                                   |     |                                 |                                 |                                     | Group II: 21.5 ± 3.3 (male);<br>18.7 ± 0.6 (female) | Group II: 79.2 ±<br>16.6 (male); 62.3<br>± 8.5 (female) | Group II: 179.4 ±<br>9.7 (male); 165.3 ±<br>5.5 (female) | Swimmers with no<br>history<br>of shoulder pain<br>(asymptomatic<br>shoulders) and with a<br>history<br>of shoulder pain<br><br>Group II: Healthy<br>individuals without<br>history of long-term<br>participation (>5 years)<br>in overhead sports or<br>occupations<br>(asymptomatic<br>shoulders) |
| Borsa et al. (2006) [27]          | USA | 34                              | 68                              | NR                                  | 24.4 ± 3.7                                          | 94.5 ± 9.6                                              | 188.3 ± 6.2                                              | Professional baseball<br>pitchers<br>(asymptomatic<br>shoulders)                                                                                                                                                                                                                                    |
| Crawford & Sauers<br>(2006) [28]  | USA | 22                              | 44                              | NR                                  | 16.50 ± 0.74                                        | 75.43 ± 13.24                                           | 178.51 ± 7.66                                            | High school baseball<br>pitchers<br>(asymptomatic<br>shoulders)                                                                                                                                                                                                                                     |
| Ellenbecker et al.<br>(2000) [29] | USA | 20                              | 40                              | NR                                  | 21.25 ± 2.31 [18 - 30]                              | NR                                                      | NR                                                       | Professional baseball<br>pitchers<br>(asymptomatic<br>shoulders)                                                                                                                                                                                                                                    |
| Friscia et al. (2008) [30]        | USA | Group I: 15<br><br>Group II: 15 | Group I: 30<br><br>Group II: 30 | Group I: 15/0<br><br>Group II: 15/0 | Group I: 16.1 ± 1.2<br><br>Group II: 17.3 ± 1.0     | Group I: 72.9 ±<br>16.9                                 | Group I: 174.9 ±<br>6.9                                  | Group I: High school<br>baseball athletes with<br>≥2 consecutive years of                                                                                                                                                                                                                           |

|                             |         |                                                                                           |                                                                                           |                                                                                               |                                                                                                                                                                                                              |                       |                       |                                                                                                                                                                                                                                                                                                                          |
|-----------------------------|---------|-------------------------------------------------------------------------------------------|-------------------------------------------------------------------------------------------|-----------------------------------------------------------------------------------------------|--------------------------------------------------------------------------------------------------------------------------------------------------------------------------------------------------------------|-----------------------|-----------------------|--------------------------------------------------------------------------------------------------------------------------------------------------------------------------------------------------------------------------------------------------------------------------------------------------------------------------|
|                             |         |                                                                                           |                                                                                           |                                                                                               |                                                                                                                                                                                                              | Group II: 79.9 ± 12.8 | Group II: 183.5 ± 8.4 | participation (asymptomatic shoulders).<br><br>Group II: Individuals that did not participate in sports throwing in the past five years (asymptomatic shoulders).                                                                                                                                                        |
| Hatzel et al. (2006) [31]   | USA     | 46                                                                                        | 46                                                                                        | 19/27                                                                                         | 22.47 ± 3.5                                                                                                                                                                                                  | 70.1 ± 11.7           | 165.2 ± 9.1           | Healthy individuals (asymptomatic shoulder).                                                                                                                                                                                                                                                                             |
| Jørgensen & Bak (1995) [32] | Denmark | Group I: 10<br>Group II: 10<br>Group III: 10<br>Group IV: 10<br>Reproducibility group: 20 | Group I: 20<br>Group II: 20<br>Group III: 20<br>Group IV: 20<br>Reproducibility group: 40 | Group I: 5/5<br>Group II: 7/3<br>Group III: 5/5<br>Group IV: 1/9<br>Reproducibility group: NR | Group I: Median age 25 [15 - 40]<br><br>Group II: Median age 30 [18 - 49]<br><br>Group III: Median age 23 [16-45]<br><br>Group IV: Median age 24 [18-45]<br><br>Reproducibility group: Median age 27 [15-49] | NR                    | NR                    | Group I: Individuals with bilateral healthy shoulders.<br><br>Group II: Individuals with history of a unilateral, traumatic anterior shoulder dislocation<br><br>Group III: Overhead athletes without history of traumatic dislocation, but with unilateral pain and a sensation of instability during overhead activity |

|                              |         |                             |                             |                                 |                                             |            |             |                                                                                                                                                                                                                             |
|------------------------------|---------|-----------------------------|-----------------------------|---------------------------------|---------------------------------------------|------------|-------------|-----------------------------------------------------------------------------------------------------------------------------------------------------------------------------------------------------------------------------|
|                              |         |                             |                             |                                 |                                             |            |             | Group IV: Individuals with atraumatic multidirectional instability due to generalized joint hyperlaxity                                                                                                                     |
|                              |         |                             |                             |                                 |                                             |            |             | Reproducibility group: Individuals among the hospital staff (asymptomatic shoulder) and patients seen with known instability                                                                                                |
| Jørgensen et al. (1999) [33] | Denmark | Group I: 21<br>Group II: 20 | Group I: 21<br>Group II: 20 | Group I: 15/6<br>Group II: 15/5 | Group I: 28 [20–41]<br>Group II: 28 [18–51] | NR         | NR          | Group I: Individuals that had arthroscopic surgery for recurrent post-traumatic anterior shoulder dislocation<br><br>Group II: Individuals that had open surgery for recurrent post-traumatic anterior shoulder dislocation |
| Laudner et al. (2012)a [34]  | USA     | 58                          | 116                         | 58/0                            | 22.6 ± 2.6                                  | 88.2 ± 8.2 | 188.7 ± 4.6 | Professional baseball pitchers (asymptomatic shoulders).                                                                                                                                                                    |

|                             |           |              |              |                |                                   |                      |                       |                                                                                                                                                       |
|-----------------------------|-----------|--------------|--------------|----------------|-----------------------------------|----------------------|-----------------------|-------------------------------------------------------------------------------------------------------------------------------------------------------|
| Laudner et al. (2012)b [35] | USA       | 30           | 30           | 30/0           | 20.2 ± 1.4                        | 88.9 ± 9.7           | 185.0 ± 5.0           | Collegiate baseball players - pitchers and position players (asymptomatic shoulders).                                                                 |
| Laudner et al. (2013) [36]  | USA       | Group I: 24  | Group I: 24  | Group I: 0/24  | Group I: 19.6 ± 1.8               | Group I: 60.7 ± 16.3 | Group I: 163.8 ± 9.9  | Group I: cheerleaders of varsity team (asymptomatic shoulders).                                                                                       |
|                             |           | Group II: 17 | Group II: 17 | Group II: 0/17 | Group II: 18.8 ± 0.9              | Group II: 56.1 ± 6.2 | Group II: 161.3 ± 4.7 | Group II: cheerleaders of competition team (asymptomatic shoulders).                                                                                  |
| Park et al. (2016) [37]     | Korea     | Group I: 36  | Group I: 36  | Group I: 28/8  | Group I: Median age 26.1 [15-57]  | NR                   | NR                    | Group I: Individuals who experienced anterior shoulder dislocation (27 individuals with anterior instability and 9 with multidirectional instability) |
|                             |           | Group II: 23 | Group II: 46 | Group II: 19/4 | Group II: Median age 19.7 [14-25] |                      |                       | Group II: Volunteers without abnormal symptoms.                                                                                                       |
| Pizzari et al. (1999) [38]  | Australia | 28           | 56           | 12/16          | 22.1 ± 2.9 [19-34]                | NR                   | NR                    | Undergraduate physiotherapy students (asymptomatic shoulders).                                                                                        |



|                               |     |    |     |       |            |    |    |                                                       |
|-------------------------------|-----|----|-----|-------|------------|----|----|-------------------------------------------------------|
| Sauers et al. (2001)a<br>[39] | USA | 20 | 40  | 13/12 | 21.9 ± 2.6 | NR | NR | Healthy individuals<br>(asymptomatic<br>shoulder).    |
| Sauers et al. (2001)b<br>[40] | USA | 51 | 102 | 23/28 | 22 ± 2.8   | NR | NR | Recreational athletes<br>(asymptomatic<br>shoulder).  |
| Taylor & Bandy (2005)<br>[41] | USA | 15 | 15  | 6/9   | 25 ± 4     | NR | NR | Volunteer individuals<br>(asymptomatic<br>shoulders). |

M: male; F: Female; yrs: Years; Kg: kilograms; cm: centimetres; M: Mean; SD: standard deviation; NR: not reported

\* Experiment 1 – to quantify glenohumeral laxity in asymptomatic shoulders using a graded stress technique; Experiment 2- to determine test-retest and interrater repeatability of the sonographic imaging method and measurement procedure

**Table S4.** Device characteristics and measurement of GH laxity/stiffness.

| Reference                 | Device                                       | Method of force application | Amount of load        | Direction of force | Shoulder position                                                                                                                                  | Shoulder fixation                                                                                                                                                                                                                        | Laxity measurement system                                          | Procedure                                                                                                             |
|---------------------------|----------------------------------------------|-----------------------------|-----------------------|--------------------|----------------------------------------------------------------------------------------------------------------------------------------------------|------------------------------------------------------------------------------------------------------------------------------------------------------------------------------------------------------------------------------------------|--------------------------------------------------------------------|-----------------------------------------------------------------------------------------------------------------------|
| Azarsa et al. (2021) [19] | Custom-designed robotic device               | E-MECH                      | 10 - 80 N             | Inferior           | Individuals were placed in a supine position. Shoulder at 90° of abduction and external rotation.                                                  | Gripper platform for upper limb positioning and fixation.                                                                                                                                                                                | Digital motion controller + Visual Studio C++ software             | Mean of the slopes of the linear portions of the force – displacement curves as the independent variables (stiffness) |
| Borsa et al. (1999) [20]  | Customized instrumented shoulder arthrometer | H-MECH                      | 67, 89, 111 and 134 N | PA and AP          | Individuals were placed in a sitting position. Shoulder at 20° abduction and neutral rotation, with the elbow at 90° flexion and forearm pronated. | Crossed torso straps (anterior fixation) and another strap at the elbow (anterior fixation). The experimenter additionally stabilized the scapula with his thumb (coracoid process) and index finger (scapular spine) during each trial. | Sensor: records the shoulder position (acromion and humeral head). | Amount of displacement of the humeral head and acromion.                                                              |
| Borsa et al. (2000) [21]  | Customized instrumented shoulder arthrometer | H-MECH                      | 0 - 134 N             | PA and AP          | Individuals were placed in a sitting position. Shoulder at 20° abduction and neutral rotation, with the elbow at 90°                               | Crossed torso straps (anterior fixation) and another strap at the elbow (anterior fixation). The experimenter additionally stabilized the scapula with his                                                                               | Sensor: records the shoulder position                              | Amount of displacement of the humeral head and acromion.                                                              |

|                                    |                                              |        |                                |                     |                                                                                                                                                    |                                                                                                                                                                                                                                                                                                |                                                                                                                                                                                  |                                                                                                                                                                                     |
|------------------------------------|----------------------------------------------|--------|--------------------------------|---------------------|----------------------------------------------------------------------------------------------------------------------------------------------------|------------------------------------------------------------------------------------------------------------------------------------------------------------------------------------------------------------------------------------------------------------------------------------------------|----------------------------------------------------------------------------------------------------------------------------------------------------------------------------------|-------------------------------------------------------------------------------------------------------------------------------------------------------------------------------------|
|                                    |                                              |        |                                |                     | flexion and forearm pronated.                                                                                                                      | thumb (coracoid process) and index finger (scapular spine) during each trial.                                                                                                                                                                                                                  |                                                                                                                                                                                  |                                                                                                                                                                                     |
| Borsa et al. (2001, 2002) [22, 23] | Customized instrumented shoulder arthrometer | H-MECH | NR (until a capsular endpoint) | PA, AP and inferior | Individuals were placed in a sitting position. Shoulder at 20° abduction and neutral rotation, with the elbow at 90° flexion and forearm pronated. | Crossed torso straps (anterior fixation) and another strap at the elbow (anterior fixation). The experimenter additionally stabilized the scapula with his thumb (coracoid process) and index finger (scapular spine) during each trial. For inferior translation, the elbow strap is removed. | Sensor: records the shoulder position for sagittal translation (acromion and humeral head) and inferior translation (humeral head and lateral epicondyle of the distal humerus). | Amount of displacement of the humeral head and acromion; and for inferior translation, the amount of displacement of the humeral head and lateral epicondyle of the distal humerus. |
| Borsa et al. (2005)a [24]          | TELOS (Telos, Weiterstadt, Germany)          | H-MECH | 15 daN (150 N)                 | PA and AP           | Individuals were placed in a sitting position. Shoulder at 90° of abduction in the scapular plane and 60° of external rotation.                    | Two adjustable counterbearings for stabilizing the shoulder girdle (scapula and coracoid process).                                                                                                                                                                                             | Portable US scanner.                                                                                                                                                             | Distance between the posterior glenoid to the posterior humeral head along the scapular plane.                                                                                      |
| Borsa et al. (2005)b* [25]         | TELOS (Telos, Weiterstadt, Germany)          | H-MECH | Experiment 1: 10 daN (100 N)   | PA and AP           | Individuals were placed in a sitting position. Shoulder at 90° of abduction in the                                                                 | Two adjustable counterbearings for stabilizing the shoulder girdle (scapula and coracoid process).                                                                                                                                                                                             | Standard radiography and portable US scanner.                                                                                                                                    | Radiography: distance between the center of the humeral head from the center of the glenoid.                                                                                        |

|                               |                                                                                                               |        |                                 |           |                                                                                                                                 |                                                                                                    |                            |                                                                                                                                                            |
|-------------------------------|---------------------------------------------------------------------------------------------------------------|--------|---------------------------------|-----------|---------------------------------------------------------------------------------------------------------------------------------|----------------------------------------------------------------------------------------------------|----------------------------|------------------------------------------------------------------------------------------------------------------------------------------------------------|
|                               |                                                                                                               |        | Experiment 2: 0 -10 daN (100 N) |           | scapular plane and 60° of external rotation.                                                                                    |                                                                                                    |                            | US: distance in glenohumeral position between the baseline image (0-dN force) and stressed image (10-dN force).                                            |
| Borsa et al. (2005)c [26]     | TELOS (Telos, Weiterstadt, Germany)                                                                           | H-MECH | 15 daN (150 N)                  | PA and AP | Individuals were placed in a sitting position. Shoulder at 90° of abduction in the scapular plane and 60° of external rotation. | Two adjustable counterbearings for stabilizing the shoulder girdle (scapula and coracoid process). | Portable US scanner.       | Distance between the posterior glenoid to the posterior humeral head along the scapular plane.                                                             |
| Borsa et al. (2006) [27]      | TELOS (Medical, Austin & Associates, Inc., Fallston, MD) + LigMaster™ (Sport Tech, Inc., Charlottesville, VA) | H-MECH | 15 daN (150 N)                  | PA and AP | Individuals were placed in a sitting position. Shoulder at 90° of abduction in the scapular plane and 60° of external rotation. | Two adjustable counterbearings for stabilizing the shoulder girdle (scapula and coracoid process). | Sensor: LigMaster™ system. | Algorithm that determines the best fit of the two lines by minimization of mean squared error to calculate the slope force-displacement curve (stiffness). |
| Crawford & Sauers (2006) [28] | Modified Telos GA — II/E + LigMaster™, (Sports Tech,                                                          | H-MECH | 15 daN (150 N)                  | PA and AP | Individuals were placed in a sitting position. Anterior GH laxity: shoulder in 90° of                                           | Coracoid process and anterior proximal forearm.                                                    | Sensor: LigMaster™ system. | Algorithm that determines the best fit of the two lines by minimization of mean squared error to                                                           |

|                                |                                                                                            |        |                |    |                                                                                                                                                                                                   |                                                                                                    |                            |                                                                                                                                                                                                                                     |
|--------------------------------|--------------------------------------------------------------------------------------------|--------|----------------|----|---------------------------------------------------------------------------------------------------------------------------------------------------------------------------------------------------|----------------------------------------------------------------------------------------------------|----------------------------|-------------------------------------------------------------------------------------------------------------------------------------------------------------------------------------------------------------------------------------|
|                                | Charlottesville, VA)                                                                       |        |                |    | abduction at neutral rotation and then at 90° of external rotation.<br><br>Posterior GH laxity: Individuals were placed in a sitting position. shoulder in 90° of abduction and neutral rotation. |                                                                                                    |                            | calculate the slope force-displacement curve (stiffness).<br><br>Displacement between the displacement data point nearest the calculated inflection point and the terminal displacement point recorded at 15 daN of force (laxity). |
| Ellenbecker et al. (2000) [29] | Telos (Gendex 5000, Universal Inc., Chicago, Illinois)                                     | H-MECH | 15 daN (150 N) | PA | Individuals were placed in a sitting position. Shoulder in 90° of abduction at the scapular plane tested with neutral rotation and then at 60° of external rotation.                              | Two adjustable counterbearings for stabilizing the shoulder girdle (scapula and coracoid process). | Standard radiography.      | Distance between the center of the humeral head from the center of the glenoid.                                                                                                                                                     |
| Friscia et al. (2008) [30]     | Modified Telos GA — II/E + Ligmaster™ (version 1.10, Sport Tech Inc., Charlottesville, VA) | H-MECH | 15 daN (150 N) | PA | Individuals were placed in a sitting position. Shoulder with 90° abduction, 90° external rotation and 90° of elbow flexion.                                                                       | Coracoid process and anterior proximal forearm.                                                    | Sensor: LigMaster™ system. | GH laxity is calculated as the total amount of displacement point recorded at 15 daN of force.                                                                                                                                      |

|                              |                                                                           |        |                       |                  |                                                                                                                                      |                                                                                                                               |                                                                          |                                                                                                                                           |
|------------------------------|---------------------------------------------------------------------------|--------|-----------------------|------------------|--------------------------------------------------------------------------------------------------------------------------------------|-------------------------------------------------------------------------------------------------------------------------------|--------------------------------------------------------------------------|-------------------------------------------------------------------------------------------------------------------------------------------|
| Hatzel et al. (2006) [31]    | Modified KT-2000 (MEDmetric Corporation, San Diego, CA)                   | H-MECH | 67 N<br>89 N<br>134 N | PA               | Individuals were placed in a supine position. Shoulder at 90° abduction, 45° of horizontal adduction, and neutral rotation.          | Sterno-clavicular area (anteriorly by the KT-2000) and scapulothoracic articulation (by the rigid extension from the device). | Sensor: records the amount of translation of the device.                 | Amount of displacement occurring at the GH joint in the sagittal plane.                                                                   |
| Jørgensen & Bak (1995) [32]  | Donjoy® Laxity Tester (Smith and Nephew Donjoy)                           | H-MECH | 20lbs (89 N)          | PA and AP global | Individuals were placed in a sitting position. Shoulder at 20° abduction and in neutral rotation and elbow flexed at 90°.            | Scapula is fixed by examiner's thumb and index finger at the acromion.                                                        | Visual-instrumented: scale on the spring balance at intervals of 0.5 mm. | Amount of displacement occurring at the GH joint in the sagittal plane.                                                                   |
| Jørgensen et al. (1999) [33] | Donjoy® Laxity Tester (Smith and Nephew Donjoy)                           | H-MECH | 20 lbs (89 N)         | PA and AP global | Individuals were placed in a sitting position. Shoulder at 20° abduction and in neutral rotation and elbow flexed at 90°.            | Scapula is fixed by examiner's thumb and index finger at the acromion.                                                        | Visual-instrumented: scale on the spring balance at intervals of 0.5 mm. | Amount of displacement occurring at the GH joint in the sagittal plane.                                                                   |
| Laudner et al. (2012)a [34]  | Modified Telos GA – II/E + LigMaster™, (Sports Tech, Charlottesville, VA) | H-MECH | 12 daN (120 N)        | PA               | Individuals were placed in a sitting position. Shoulder in 90° of abduction and 90° of external rotation, while the elbow was in 90° | Coracoid process and anterior proximal forearm.                                                                               | Sensor: LigMaster™ system.                                               | Laxity (mm): difference in displacement between the inflection point (at the end of soft tissue compression and the initiation of humeral |

|                             |                                                                           |        |                |    |                                                                                                                                                                     |                                                 |                            |                                                                                                                                                                                                                                        |
|-----------------------------|---------------------------------------------------------------------------|--------|----------------|----|---------------------------------------------------------------------------------------------------------------------------------------------------------------------|-------------------------------------------------|----------------------------|----------------------------------------------------------------------------------------------------------------------------------------------------------------------------------------------------------------------------------------|
|                             |                                                                           |        |                |    | of flexion and full pronation.                                                                                                                                      |                                                 |                            | head translation) and the final amount of displacement recorded at 12 daN of anterior force.                                                                                                                                           |
| Laudner et al. (2012)b [35] | Modified Telos GA — II/E + LigMaster™, (Sports Tech, Charlottesville, VA) | H-MECH | 12 daN (120 N) | PA | Individuals were placed in a sitting position. Shoulder in 90° of abduction and 90° of external rotation, while the elbow was in 90° of flexion and full pronation. | Coracoid process and anterior proximal forearm. | Sensor: LigMaster™ system. | Laxity (mm): difference in displacement between the inflection point (at the end of soft tissue compression and the initiation of humeral head translation) and the final amount of displacement recorded at 12 daN of anterior force. |
| Laudner et al. (2013) [36]  | Modified Telos GA — II/E + LigMaster™, (Sports Tech, Charlottesville, VA) | H-MECH | 12 daN (120 N) | PA | Individuals were placed in a sitting position. Shoulder in 90° of abduction and 90° of external rotation, while the elbow was in 90° of flexion and full pronation. | Coracoid process and anterior proximal forearm. | Sensor: LigMaster™ system. | Laxity (mm): difference in displacement between the inflection point (at the end of soft tissue compression and the initiation of humeral head translation) and the final amount of displacement recorded at 12 daN of anterior force. |

|                               |                                                                                               |        |                           |              |                                                                                                                                                                      |                                                                                                                                                                                                                           |                                                                             |                                                                                                                                                                              |
|-------------------------------|-----------------------------------------------------------------------------------------------|--------|---------------------------|--------------|----------------------------------------------------------------------------------------------------------------------------------------------------------------------|---------------------------------------------------------------------------------------------------------------------------------------------------------------------------------------------------------------------------|-----------------------------------------------------------------------------|------------------------------------------------------------------------------------------------------------------------------------------------------------------------------|
|                               |                                                                                               |        |                           |              |                                                                                                                                                                      |                                                                                                                                                                                                                           |                                                                             | Stiffness (N/mm):<br>amount of force<br>between the inflection<br>point and the terminal<br>force (12 daN) divided<br>by the amount of<br>laxity (displacement)<br>(12 daN). |
| Park et al, (2016)<br>[37]    | TELOS<br>(Telos,<br>Weiterstadt,<br>Germany)                                                  | H-MECH | 15 daN (150<br>N)         | PA and<br>AP | Individuals were<br>placed in a sitting<br>position. Shoulder<br>in 90° of<br>abduction at<br>neutral rotation<br>and then at 60° of<br>external rotation.           | Two adjustable<br>counterbearings for<br>stabilizing the<br>shoulder girdle (scapula<br>and coracoid process).                                                                                                            | Standard<br>radiography.                                                    | Distance between the<br>center of the humeral<br>head from the center<br>of the glenoid.                                                                                     |
| Pizzari et al.<br>(1999) [38] | KT-1000<br>Ligament<br>Arthrometer<br>(MEDmetric<br>Corporation,<br>San Diego,<br>California) | H-MECH | 67 N                      | AP           | Individuals were<br>placed in a supine<br>position. Shoulder<br>in 90° of<br>abduction and 90°<br>of external<br>rotation, with the<br>arm resting on the<br>plinth. | Velcro straps around the<br>arm to stabilize with the<br>arthrometer; shoulder<br>girdle stabilized with<br>pressure exerted by the<br>tester's hand over the<br>scapula and the distal<br>sensor pad of the KT-<br>1000. | Sensor: records the<br>amount of<br>translation of the<br>device.           | Amount of<br>displacement<br>occurring at the GH<br>joint in the sagittal<br>plane.                                                                                          |
| Sauers et al.<br>(2001)a [39] | Customized<br>instrumented<br>shoulder<br>arthrometer                                         | H-MECH | 67, 89, 111,<br>and 134 N | PA and<br>AP | Individuals were<br>placed in a sitting<br>position. Shoulder<br>at 20° abduction<br>and neutral                                                                     | Crossed torso straps<br>(anterior fixation) and<br>another strap at the<br>elbow (anterior<br>fixation). The                                                                                                              | Sensor: records the<br>shoulder position<br>(acromion and<br>humeral head). | Amount of<br>displacement of the<br>humeral head and<br>acromion.                                                                                                            |



|                            |                                                                             |        |                        |           |                                                                                                                                                                                               |                                                                                                                                                                                                                                          |                                                                    |                                                                         |
|----------------------------|-----------------------------------------------------------------------------|--------|------------------------|-----------|-----------------------------------------------------------------------------------------------------------------------------------------------------------------------------------------------|------------------------------------------------------------------------------------------------------------------------------------------------------------------------------------------------------------------------------------------|--------------------------------------------------------------------|-------------------------------------------------------------------------|
|                            |                                                                             |        |                        |           | rotation, with the elbow at 90° flexion and forearm pronated.                                                                                                                                 | experimenter additionally stabilized the scapula with his thumb (coracoid process) and index finger (scapular spine) during each trial.                                                                                                  |                                                                    |                                                                         |
| Sauers et al. (2001)b [40] | Customized instrumented shoulder arthrometer                                | H-MECH | 67, 89, 111, and 134 N | PA and AP | Individuals were placed in a sitting position. Shoulder at 20° abduction and neutral rotation, with the elbow at 90° flexion and forearm pronated.                                            | Crossed torso straps (anterior fixation) and another strap at the elbow (anterior fixation). The experimenter additionally stabilized the scapula with his thumb (coracoid process) and index finger (scapular spine) during each trial. | Sensor: records the shoulder position (acromion and humeral head). | Amount of displacement of the humeral head and acromion.                |
| Taylor & Bandy (2005) [41] | KT-1000 Ligament Arthrometer (MEDmetric Corporation, San Diego, California) | H-MECH | 67 N                   | PA        | Position 1:<br>Individuals were placed in a supine position. Shoulder abducted to 20° and externally rotated to 0° with the arm resting on the plinth.<br><br>Position 2:<br>Individuals were | Velcro straps around the arm to stabilize with the arthrometer; shoulder girdle stabilized with pressure exerted by the tester's hand over the scapula and the distal sensor pad of the KT-1000.                                         | Sensor: records the amount of translation of the device.           | Amount of displacement occurring at the GH joint in the sagittal plane. |

|  |  |  |  |  |                                                                                                                             |  |  |  |
|--|--|--|--|--|-----------------------------------------------------------------------------------------------------------------------------|--|--|--|
|  |  |  |  |  | placed in a supine position. Shoulder in 90° of abduction and 90° of external rotation, with the arm resting on the plinth. |  |  |  |
|--|--|--|--|--|-----------------------------------------------------------------------------------------------------------------------------|--|--|--|

NR: not reported; GH: Glenohumeral; US: ultrasound; AP: anterior-posterior; PA: posterior-anterior; AER: anterior drawer stress radiograph with 0° external rotation; PER0: posterior drawer stress radiography with 0° external rotation; AER0: anterior drawer stress radiograph with 60° external rotation; PER60: posterior drawer stress radiography with 60° external rotation, PCC: Pearson correlation coefficient; H-MECH: hand-held mechanical force application, with force measurement (e.g., by load cells); E-MECH: electromechanical system, operated by a force–displacement sensor/transducer

\* Experiment 1 – to quantify glenohumeral laxity in asymptomatic shoulders using a graded stress technique; Experiment 2- to determine test-retest and interrater repeatability of the sonographic imaging method and measurement procedure

**Table S5.** Device validity/reliability and laxity/stiffness outcomes.

| Reference                          | Device                                       | Validity | Reliability                                                                                                                                                                                                                                    | Laxity (mm) and stiffness (N/mm) |                                                                                                                                           |
|------------------------------------|----------------------------------------------|----------|------------------------------------------------------------------------------------------------------------------------------------------------------------------------------------------------------------------------------------------------|----------------------------------|-------------------------------------------------------------------------------------------------------------------------------------------|
| Azarsa et al. (2021) [19]          | Custom-designed robotized device             | NR       | ICC [within-session] = 0.96 (0.93–0.98), SEM = 0.08 N/mm<br>ICC [between-session] = 0.97 (0.95–0.99), SEM = 0.07 N/mm<br><br>Repeated measures ANOVAs:<br>Session I: (F [3, 76] = 0.18, p = 0.908)<br>Session II: (F [3, 76] = 0.47, p = 0.70) | Inferior                         | <i>Session I:</i> 1.50 ± 0.40 N/mm<br><i>Session II:</i> 1.52 ± 0.40 N/mm                                                                 |
| Borsa et al. (1999) [20]           | Customized instrumented shoulder arthrometer | NR       | Direction and load ICC = 0.94 (0.90 - 0.97), SEM = 0.88 mm.                                                                                                                                                                                    | PA                               | 67 N: 6.1 ± 1.7 mm<br>89 N: 7.4 ± 1.8 mm<br>111 N: 8.7 ± 1.9 mm<br>134 N: 9.7 ± 2.0 mm                                                    |
|                                    |                                              |          |                                                                                                                                                                                                                                                | AP                               | 67 N: 5.0 ± 2.7 mm<br>89 N: 6.1 ± 3.0 mm<br>111 N: 6.8 ± 3.7mm<br>134 N: 6.5 ± 4.1mm                                                      |
| Borsa et al. (2000) [21]           | Customized instrumented shoulder arthrometer | NR       | NR                                                                                                                                                                                                                                             | PA                               | <i>Men:</i> 8.3 ± 2.2 mm<br><i>Women:</i> 11.4 ± 2.8 mm<br><br><i>Men:</i> 20.5 ± 5.0 N/mm<br><i>Women:</i> 16.3 ± 4.2 N/mm <sup>-1</sup> |
| Borsa et al. (2001, 2002) [22, 23] | Customized instrumented shoulder arthrometer | NR       | Anterior translation: ICC [2,1] = 0.98<br>Posterior translation: ICC [2,1] = 0.96<br>Inferior translation: ICC [2,1] = 0.98                                                                                                                    | PA                               | 14.5 ± 2.3 mm<br>16.7 ± 4.5 N/mm                                                                                                          |
|                                    |                                              |          |                                                                                                                                                                                                                                                | AP                               | 14.0 ± 2.8 mm<br>15.4 ± 3.5 N/mm                                                                                                          |
|                                    |                                              |          |                                                                                                                                                                                                                                                | Inferior                         | 13.9 ± 4.6 mm<br>15.7 ± 5.6 N/mm                                                                                                          |

|                                |                                              |                                                                                   |                                                                                                                                                                  |                           |                                                                                                                                                      |
|--------------------------------|----------------------------------------------|-----------------------------------------------------------------------------------|------------------------------------------------------------------------------------------------------------------------------------------------------------------|---------------------------|------------------------------------------------------------------------------------------------------------------------------------------------------|
| Borsa et al.<br>(2005)a** [24] | TELOS<br>(Telos,<br>Weiterstadt,<br>Germany) | NR                                                                                | NR                                                                                                                                                               | PA                        | Throwing Arm: $2.62 \pm 1.78$ mm                                                                                                                     |
|                                |                                              |                                                                                   |                                                                                                                                                                  |                           | Nonthrowing Arm: $2.99 \pm 2.54$ mm                                                                                                                  |
|                                |                                              |                                                                                   |                                                                                                                                                                  |                           | Difference between throwing and non-Nonthrowing arms: $0.31 \pm 2.94$ mm                                                                             |
|                                |                                              |                                                                                   |                                                                                                                                                                  | AP                        | Throwing Arm: $5.94 \pm 3.78$ mm                                                                                                                     |
|                                |                                              |                                                                                   |                                                                                                                                                                  |                           | Nonthrowing Arm: $4.82 \pm 3.37$ mm                                                                                                                  |
|                                |                                              |                                                                                   |                                                                                                                                                                  |                           | Difference between throwing and non-Nonthrowing arms: $1.12 \pm 4.67$ mm                                                                             |
| Borsa et al.<br>(2005)b* [25]  | TELOS<br>(Telos,<br>Weiterstadt,<br>Germany) | Pearson correlation<br>$r = 0.79$ ( $r^2 = 0.62$ ) between<br>radiography and US. | Intra-rater: ICC = 0.72, SEM = 1.51 mm<br>(PA); ICC = 0.85, SEM = 0.83 mm (AP)<br>Inter-rater: ICC = 0.96, SEM = 0.40 mm<br>(PA); ICC = 0.99, SEM = 0.34 mm (AP) | Global<br>translatio<br>n | Throwing Arm: $8.72 \pm 5.01$ mm                                                                                                                     |
|                                |                                              |                                                                                   |                                                                                                                                                                  |                           | Nonthrowing Arm: $7.81 \pm 4.79$ mm                                                                                                                  |
|                                |                                              |                                                                                   |                                                                                                                                                                  |                           | Difference between throwing and non-Nonthrowing arms): $0.75 \pm 5.59$ mm                                                                            |
|                                |                                              |                                                                                   |                                                                                                                                                                  | PA                        | Experiment 2 (US): $2.77 \pm 1.4$ mm (session 1), $2.97 \pm 1.8$ mm (session 2), $2.39 \pm 1.85$ mm (examiner 1) and $2.19 \pm 1.78$ mm (examiner 2) |
|                                |                                              |                                                                                   |                                                                                                                                                                  | AP                        | Experiment 1: $3.97 \pm 2.2$ mm (US) and $2.96 \pm 2.0$ mm (radiography)                                                                             |
|                                |                                              |                                                                                   |                                                                                                                                                                  |                           | Experiment 2 (US): $5.47 \pm 2.5$ mm (session 1), $5.03 \pm 1.8$ mm (session 2), $4.87 \pm 3.41$ mm (examiner 1) and $4.89 \pm 3.41$ mm (examiner 2) |

|                                       |                                                                                                                                              |    |                                                                                                                                                                                                                                                             |    |                                                                                                                                                                                                                                                |
|---------------------------------------|----------------------------------------------------------------------------------------------------------------------------------------------|----|-------------------------------------------------------------------------------------------------------------------------------------------------------------------------------------------------------------------------------------------------------------|----|------------------------------------------------------------------------------------------------------------------------------------------------------------------------------------------------------------------------------------------------|
| Borsa et al.<br>(2005)c [26]          | TELOS<br>(Telos,<br>Weiterstadt,<br>Germany)                                                                                                 | NR | NR                                                                                                                                                                                                                                                          | PA | <p>Group I: <math>2.74 \pm 1.8</math> mm (no history pain)<br/>and <math>2.90 \pm 1.6</math> (history pain)</p> <p>Group II: <math>2.74 \pm 1.7</math> mm</p> <p>Difference between Group I and Group II:<br/><math>0.08 \pm 1.7</math> mm</p> |
|                                       |                                                                                                                                              |    |                                                                                                                                                                                                                                                             | AP | <p>Group I: <math>5.14 \pm 2.6</math> mm (no history pain<br/>and <math>5.42 \pm 2.3</math> (history pain)</p> <p>Group II: <math>4.90 \pm 2.7</math> mm</p> <p>Difference between Group I and Group II:<br/><math>0.40 \pm 2.5</math> mm</p>  |
| Borsa et al.<br>(2006) [27]           | TELOS<br>(Medical,<br>Austin &<br>Associates,<br>Inc., Fallston,<br>MD) +<br>LigMaster™<br>(Sport Tech,<br>Inc.,<br>Charlottesvil<br>le, VA) | NR | Right Arms - PA: ICC = 0.29, SEM =<br>$1.17 \text{ N.mm}^{-1}$<br>Right Arms-AP: ICC = 0.69, SEM = 1.78<br>$\text{N.mm}^{-1}$<br>Left Arms PA: ICC = 0.49, SEM = 1.28<br>$\text{N.mm}^{-1}$<br>Left Arms - AP: ICC = 0.89, SEM = 1.18<br>$\text{N.mm}^{-1}$ | PA | <p>Throwing Arm: <math>16.6 \pm 1.9</math> N/mm</p> <p>Nonthrowing Arm: <math>16.2 \pm 1.7</math> N/mm</p> <p>Difference between Throwing and non-<br/>Nonthrowing arms: <math>0.4 \pm 1.8 \text{ N/mm}^{-1}</math></p>                        |
|                                       |                                                                                                                                              |    |                                                                                                                                                                                                                                                             | AP | <p>Throwing Arm: <math>15.1 \pm 3.4</math> N/mm</p> <p>Nonthrowing Arm: <math>15.3 \pm 3.8</math> N/mm</p> <p>Difference between Throwing and non-<br/>Nonthrowing arms: <math>-0.2 \pm 3.6 \text{ N/mm}^{-1}</math></p>                       |
| Crawford &<br>Sauers<br>(2006)** [28] | LigMaster,<br>(Sports Tech,<br>Charlottesvil<br>l, VA)                                                                                       | NR | Laxity:<br>ICC [2,1] = 0.84, SEM = 0.53 mm; ICC<br>[2,k] = 0.83, SEM = 0.43 mm<br><br>Stiffness:                                                                                                                                                            | PA | <p>Throwing Arm:</p> <p>Neutral rotation: <math>11.90 \pm 1.93</math> mm and<br/><math>8.05 \pm 1.09</math> N/mm</p> <p>External rotation: <math>9.15 \pm 0.91</math> mm and<br/><math>10.87 \pm 0.98</math> N/mm</p>                          |

|                                |                                                        |                                                                                                                                                                                                                                                      |                                                                         |                    |                                                                                                                                                                                                                                                                                                                                                        |
|--------------------------------|--------------------------------------------------------|------------------------------------------------------------------------------------------------------------------------------------------------------------------------------------------------------------------------------------------------------|-------------------------------------------------------------------------|--------------------|--------------------------------------------------------------------------------------------------------------------------------------------------------------------------------------------------------------------------------------------------------------------------------------------------------------------------------------------------------|
|                                |                                                        |                                                                                                                                                                                                                                                      | ICC [2,1] = 0.84, SEM = 0.52 N/mm;<br>ICC [2,k] = 0.88, SEM = 0.37 N/mm |                    | <i>Nonthrowing Arm:</i><br><i>Neutral rotation:</i> 12.45 ± 1.97 mm and 7.77 ± 0.94 N/mm<br><i>External rotation:</i> 9.63 ± 1.24 mm and 10.24 ± 1.19 N/mm                                                                                                                                                                                             |
|                                |                                                        |                                                                                                                                                                                                                                                      |                                                                         | AP                 | <i>Throwing Arm:</i><br><i>Neutral rotation:</i> 12.71 ± 2.51 mm and 8.00 ± 1.21 N/mm<br><br><i>Nonthrowing Arm:</i><br><i>Neutral rotation:</i> 12.46 ± 1.95 mm and 8.05 ± 1.29 N/mm                                                                                                                                                                  |
|                                |                                                        |                                                                                                                                                                                                                                                      |                                                                         | Global translation | <i>Throwing Arm:</i> 24.61 ± 3.67 mm<br><i>Nonthrowing Arm:</i> 24.92 ± 3.08 mm                                                                                                                                                                                                                                                                        |
| Ellenbecker et al. (2000) [29] | Telos (Gendex 5000, Universal Inc., Chicago, Illinois) | <i>Pearson correlation between stress radiography and manual translation.</i><br><br>Neutral rotation<br>Dominant Arm: r = 0.1194<br>Nondominant Arm: r = 0.3253<br><br>External rotation<br>Dominant Arm: r = 0.0270<br>Nondominant Arm: r = 0.3088 | ICC = 0.635 (neutral rotation)<br>ICC = 0.679 (external rotation)       | PA                 | <i>Dominant Arm:</i> 2.08 ± 2.97 mm (Neutral rotation) and 1.40 ± 2.14 mm (External rotation)<br><br><i>Nondominant Arm:</i> 2.23 ± 2.41 mm (Neutral rotation) and 2.07 ± 2.10 mm (External rotation)<br><br><i>Difference between Dominant and non-Nondominant arm):</i> - 0.15 ± 4.06 mm (Neutral rotation) and - 0.67 ± 2.93 mm (External rotation) |
| Friscia et al. (2008) [30]     | Modified Telos GA—II/E +                               | NR                                                                                                                                                                                                                                                   | NR                                                                      | PA                 | <i>Baseball Players:</i> 9.64 ± 1.70 mm 8 dominant Arm) and 9.01 ± 1.33 mm (nondominant Arm)                                                                                                                                                                                                                                                           |

|                                     |                                                                                               |    |                                                                                                                                                                               |                           |                                                                                                                                                                                                                                                                                                                                                                                                                                                                                                                            |
|-------------------------------------|-----------------------------------------------------------------------------------------------|----|-------------------------------------------------------------------------------------------------------------------------------------------------------------------------------|---------------------------|----------------------------------------------------------------------------------------------------------------------------------------------------------------------------------------------------------------------------------------------------------------------------------------------------------------------------------------------------------------------------------------------------------------------------------------------------------------------------------------------------------------------------|
|                                     | Ligmaster™<br>(version 1.10,<br>Sport Tech<br>Inc.,<br>Charlottesville,<br>VA)                |    |                                                                                                                                                                               |                           | <i>Non-Baseball Players:</i> 10.89 ± 1.56 mm<br>(dominant Arm) and 10.40 ± 1.02 mm<br>(nondominant Arm)                                                                                                                                                                                                                                                                                                                                                                                                                    |
| Hatzel et al.<br>(2006) [31]        | KT-2000<br>knee<br>ligament<br>arthrometer<br>(MEDmetric<br>Corporation,<br>San Diego,<br>CA) | NR | 67 N: ICC = 0.887 (95% CI 0.83–0.93),<br>SEM = 0.845 mm<br>89 N: ICC = 0.88 (95% CI 0.81– 0.92),<br>SEM = 0.814 mm<br>134N: ICC = 0.91 (95% CI 0.87– 0.94),<br>SEM = 0.869 mm | PA                        | 67 N: 12.55 ± 2.49 (day 1) and 12.35 ± 2.54<br>(day 2)<br>89 N: 17.70 ± 3.09 mm (day 1) and 17.77<br>± 3.01 mm (day 2)<br>134 N: 27.41 ± 4.37 mm (day 1) and 28.03<br>± 3.96 mm (day 2)                                                                                                                                                                                                                                                                                                                                    |
| Jørgensen<br>& Bak<br>(1995)** [32] | Donjoy®<br>Knee                                                                               | NR | ICC = 0.996                                                                                                                                                                   | Global<br>translatio<br>n | <i>Group I:</i> 2.1 ± 1.7 mm (left) and 2.1 ± 1.7<br>mm (right) and 0.6 ± 0.5 mm (difference<br>between left and right)<br><br><i>Group II:</i> 6.4 ± 3.6 mm (left) and 2.8 ± 2.9<br>mm (right) and 3.6 ± 2.0 mm (difference<br>between left and right)<br><br><i>Group III:</i> 5.8 ± 2.6 mm (left) and 3.2 ± 2.0<br>mm (right) and 2.6 ± 1.8 mm (difference<br>between left and right)<br><br><i>Group IV:</i> 11.9 ± 6.3 mm (left) and 11.0 ±<br>6.4 mm (right) and 2.3 ± 2.1 mm<br>(difference between left and right) |

|                                |                                                                        |    |    |                    |                                                                                                                                                                                                                                                                                                                                                                |
|--------------------------------|------------------------------------------------------------------------|----|----|--------------------|----------------------------------------------------------------------------------------------------------------------------------------------------------------------------------------------------------------------------------------------------------------------------------------------------------------------------------------------------------------|
|                                |                                                                        |    |    |                    | Reproducibility group: $3.02 \pm 2.24$ mm (test) and $3.30 \pm 2.27$ mm (re-test)                                                                                                                                                                                                                                                                              |
| Jørgensen et al. (1999)** [33] | Laxity Tester (Smith and Nephew Donjoy)                                | NR | NR | Global translation | <i>Difference between</i> mean side difference $0.6 \pm 2.9$ mm (Group I) and $1.1 \pm 3.6$ mm (Group II)                                                                                                                                                                                                                                                      |
| Laudner et al. (2012)a [34]    | Modified Telos GA—II/E + LigMaster, (Sports Tech, Charlottesville, VA) | NR | NR | PA                 | $10.0 \pm 6.2$ mm                                                                                                                                                                                                                                                                                                                                              |
| Laudner et al. (2012)b [35]    | Modified Telos GA—II/E + LigMaster, (Sports Tech, Charlottesville, VA) | NR | NR | PA                 | $14.1 \pm 6.0$ mm                                                                                                                                                                                                                                                                                                                                              |
| Laudner et al. (2013) [36]     | Modified Telos GA—II/E + LigMaster, (Sports Tech, Charlottesville, VA) | NR | NR | PA                 | <p><i>Group I:</i> <math>13.5 \pm 3.1</math> mm (pre) and <math>11.6 \pm 5.8</math> mm (post) and <math>2.0 \pm 6.6</math> mm (difference between pre-test and post-test);</p> <p><i>Group II:</i> <math>11.7 \pm 4.1</math> mm (pre) and <math>13.5 \pm 4.4</math> mm (post) and <math>-1.8 \pm 2.8</math> mm (difference between pre-test and post-test)</p> |



|                            |                                                      |                                                                                                                                                                                                                                                                                                                                                                                                                                                                                                                   |                                                                                                                                                                                                                                                                             |    |                                                                                                                                                                                                                                                                                                                                                       |
|----------------------------|------------------------------------------------------|-------------------------------------------------------------------------------------------------------------------------------------------------------------------------------------------------------------------------------------------------------------------------------------------------------------------------------------------------------------------------------------------------------------------------------------------------------------------------------------------------------------------|-----------------------------------------------------------------------------------------------------------------------------------------------------------------------------------------------------------------------------------------------------------------------------|----|-------------------------------------------------------------------------------------------------------------------------------------------------------------------------------------------------------------------------------------------------------------------------------------------------------------------------------------------------------|
|                            |                                                      |                                                                                                                                                                                                                                                                                                                                                                                                                                                                                                                   |                                                                                                                                                                                                                                                                             |    | <p>Group I: <math>9.4 \pm 0.61</math> N/mm (pre) and <math>9.4 \pm 1.0</math> N/mm (post) and <math>0.01 \pm 1.0</math> mm (difference between pre-test and post-test)</p> <p>Group II: <math>9.0 \pm 0.78</math> N/mm (pre) and <math>8.3 \pm 1.3</math> N/mm (post) and <math>0.8 \pm 1.1</math> mm (difference between pre-test and post-test)</p> |
| Park et al. (2016) [37]    | TELOS (Telos, Weiterstadt, Germany)                  | <p>Pearson correlation between anterior drawer test and stress radiography.</p> <p>At AER60 (<math>0.453</math>; <math>p = 0.005</math>); and AER0 (<math>0.529</math>; <math>p = 0.001</math>).</p> <p>Under anesthesia and at AER60 (<math>0.287</math>; <math>p = 0.264</math>), and AER0 (<math>0.695</math>; <math>p = 0.002</math>).</p> <p>Differences between anterior drawer test and stress radiography (<i>t-test</i>):</p> <p>At AER60 (<math>p = 0.773</math>) and AER0 (<math>p = 0.529</math>)</p> | NR                                                                                                                                                                                                                                                                          | PA | <p>Group I: <math>2.0 \pm 1.5</math> mm (AER60) and <math>3.4 \pm 1.3</math> mm (AER0)</p> <p>Group II: <math>0.7 \pm 1.1</math> mm (AER60) and <math>1.3 \pm 1.6</math> mm (AER0)</p>                                                                                                                                                                |
|                            |                                                      |                                                                                                                                                                                                                                                                                                                                                                                                                                                                                                                   |                                                                                                                                                                                                                                                                             | AP | <p>Group I: <math>3.0 \pm 4.4</math> mm (PER60) and <math>3.6 \pm 5.2</math> mm (PER0)</p> <p>Group II: <math>1.3 \pm 1.4</math> mm (PER60) and <math>1.0 \pm 1.2</math> mm (PER0)</p>                                                                                                                                                                |
|                            |                                                      |                                                                                                                                                                                                                                                                                                                                                                                                                                                                                                                   |                                                                                                                                                                                                                                                                             |    | <p>Difference between Affected Arms X Nonaffected Arms: <math>1.39</math> mm (AER60) and <math>1.97</math> mm (AER0)</p>                                                                                                                                                                                                                              |
| Pizzari et al. (1999) [38] | KT-1000 Ligament Arthrometer (MEDmetric Corporation, | NR                                                                                                                                                                                                                                                                                                                                                                                                                                                                                                                | <p>Dominant Arm: ICC = <math>0.67</math></p> <p>Nondominant Arm: ICC = <math>0.76</math></p> <p>Inter-rater reliability: paired t test:</p> <p>Dominant Arm: <math>0.24</math>, <math>p = 0.81</math></p> <p>Nondominant Arm: <math>-0.82</math>, <math>p = 0.42</math></p> | AP | <p>Dominant Arm: <math>20.2 \pm 5.0</math> mm (test) and <math>20.1 \pm 4.7</math> mm (retest) and <math>-0.179 \pm 3.98</math> mm (difference between test and retest)</p> <p>Nondominant Arm: <math>21.5 \pm 4.8</math> mm (test) and</p>                                                                                                           |

|                            |                                                                             |    |                                                                                                                                                                                                                                                                                                        |                                              |                                                                                                                                                                                           |
|----------------------------|-----------------------------------------------------------------------------|----|--------------------------------------------------------------------------------------------------------------------------------------------------------------------------------------------------------------------------------------------------------------------------------------------------------|----------------------------------------------|-------------------------------------------------------------------------------------------------------------------------------------------------------------------------------------------|
|                            | San Diego, California)                                                      |    |                                                                                                                                                                                                                                                                                                        |                                              | 22.0 ± 4.9 mm (retest) and 0.518 ± 3.36 mm (difference between test and retest)                                                                                                           |
| Sauers et al. (2001)a [39] | Customized instrumented shoulder arthrometer                                | NR | Between-trial: ICC <sub>2,1</sub> = 0.92 (0.77–0.96), SEM = 0.56 mm (0.45 – 0.73 mm)<br><br>Between-session (Intra-rater): ICC <sub>2,1</sub> = 0.73 (0.60–0.88), SEM = 1.5 mm (0.79–1.9 mm)<br><br>Between-examiner (Inter-rater): ICC <sub>2,1</sub> = 0.74 (0.66–0.81), SEM = 1.7 mm (1.3 – 2.1 mm) | PA<br><br><br><br><br><br><br><br><br><br>AP | 67 N: 7.5 ± 2.1 mm<br>89 N: 8.9 ± 2.3 mm<br>111 N: 10.2 ± 2.6 mm<br>134 N: 11.3 ± 2.8 mm<br><br>67 N: 9.3 ± 2.2 mm<br>89 N: 10.7 ± 2.3 mm<br>111 N: 11.8 ± 2.4 mm<br>134 N: 12.7 ± 2.5 mm |
| Sauers et al. (2001)b [40] | Customized instrumented shoulder arthrometer                                | NR | NR                                                                                                                                                                                                                                                                                                     | PA<br><br><br><br><br><br><br><br><br><br>AP | 67 N: 8.0 ± 2.2 mm<br>89 N: 9.4 ± 2.5 mm<br>111 N: 10.7 ± 2.7 mm<br>134 N: 11.9 ± 2.9 mm<br><br>67 N: 8.6 ± 2.7 mm<br>89 N: 9.9 ± 3.0 mm<br>111 N: 10.9 ± 3.2 mm<br>134 N: 11.8 ± 3.3 mm  |
| Taylor & Bandy (2005) [41] | KT-1000 Ligament Arthrometer (MEDmetric Corporation, San Diego, California) | NR | Position 1: ICC = 0.93 (95% CI 0.81–0.98)<br>Position 2: ICC= 0.93 (95% CI 0.80–0.97)<br><br>Dependent <i>t-test</i> (position 1/position 2) = <i>P</i> = 0.01                                                                                                                                         | PA                                           | <i>Position 1</i> : 11 ± 3 mm (test) and 10 ± 2 mm (retest)<br><br><i>Position 2</i> : 6 ± 2 mm (test) and 6 ± 1 mm retest)                                                               |

NR: not reported; GH: Glenohumeral; US: ultrasound; AP: anterior-posterior; PA: posterior-anterior; AER: anterior drawer stress radiograph with 0° external rotation; PER0: posterior drawer stress radiography with 0° external rotation; AER0: anterior drawer stress radiograph with 60° external rotation; PER60: posterior drawer stress radiography with 60° external rotation

\*Experiment 1 – to quantify glenohumeral laxity in asymptomatic shoulders using a graded stress technique; Experiment 2- to determine test-retest and interrater repeatability of the sonographic imaging method and measurement procedure

\*\*Global translation represents PA + AP

**Figure S1.** Risk of bias judgement.

|                           | D1 | D2 | D3 | D4 | D5 | D6 |
|---------------------------|----|----|----|----|----|----|
| Borsa et al. (1999)       | +  | +  | X  | X  | +  | +  |
| Borsa et al. (2000)       | +  | X  | X  | X  | +  | +  |
| Borsa et al. (2001)       | +  | +  | X  | X  | +  | +  |
| Borsa et al. (2005a)      | X  | X  | +  | X  | +  | +  |
| Borsa et al. (2005b)      | +  | X  | +  | +  | +  | +  |
| Borsa et al. (2005c)      | X  | X  | +  | +  | +  | +  |
| Crawford et al. (2006)    | X  | X  | X  | X  | +  | +  |
| Ellenbecker et al. (2000) | +  | X  | +  | +  | +  | +  |
| Frischia et al. (2008)    | X  | +  | X  | X  | +  | +  |
| Hatzel et al. (2006)      | +  | +  | X  | +  | +  | +  |
| Jorgensen et al. (1995)   | X  | X  | X  | X  | +  | X  |
| Jorgensen et al. (1999)   | +  | X  | X  | +  | +  | +  |
| Laudner et al. (2012a)    | X  | X  | X  | X  | +  | +  |
| Laudner et al. (2012b)    | X  | +  | X  | X  | +  | +  |
| Laudner et al. (2013)     | X  | +  | X  | X  | +  | +  |
| Park et al. (2016)        | +  | X  | +  | X  | +  | +  |
| Pizzari et al. (1999)     | +  | +  | X  | X  | +  | +  |
| Sauers at al. (2001a)     | +  | X  | X  | +  | +  | +  |
| Sauers at al. (2001b)     | +  | X  | X  | X  | +  | +  |
| Taylor et al. (2005)      | X  | +  | X  | +  | +  | +  |

D1: Selection of participants  
D2: Confounding variables  
D3: Measurement of exposure  
D4: Blinding outcome assessment  
D5: Incomplete outcome data  
D6: Selective outcome reporting

Judgement  
X High  
+ Low

**Figure S1.1.** Individual study risk of bias for GH laxity.

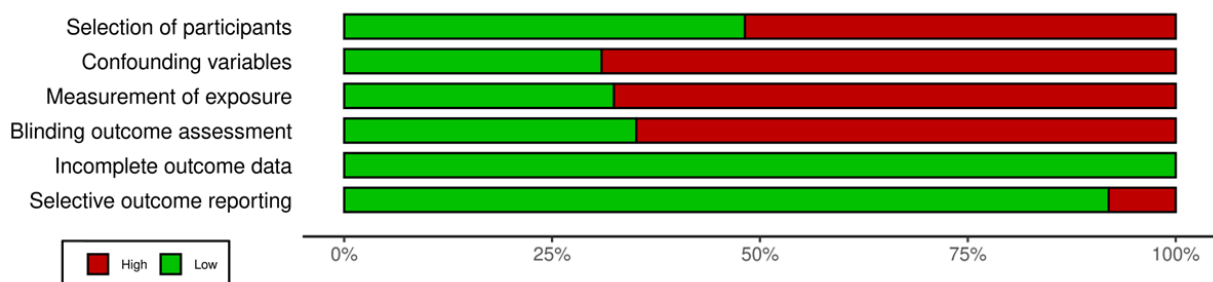

**Figure S1.2 – Overall domain-based risk of bias for GH laxity.**

|                        | D1 | D2 | D3 | D4 | D5 | D6 |
|------------------------|----|----|----|----|----|----|
| Azarsa et al. (2021)   | +  | +  | +  | X  | +  | +  |
| Borsa et al. (2000)    | +  | X  | +  | X  | +  | +  |
| Borsa et al. (2002)    | +  | +  | +  | X  | +  | +  |
| Borsa et al. (2006)    | +  | X  | +  | +  | +  | +  |
| Crawford et al. (2006) | X  | X  | +  | X  | +  | +  |

D1: Selection of participants  
 D2: Confounding variables  
 D3: Measurement of exposure  
 D4: Blinding outcome assessment  
 D5: Incomplete outcome data  
 D6: Selective outcome reporting

Judgement  
 X High  
 + Low

**Figure S1.3.** Individual study risk of bias for GH stiffness.

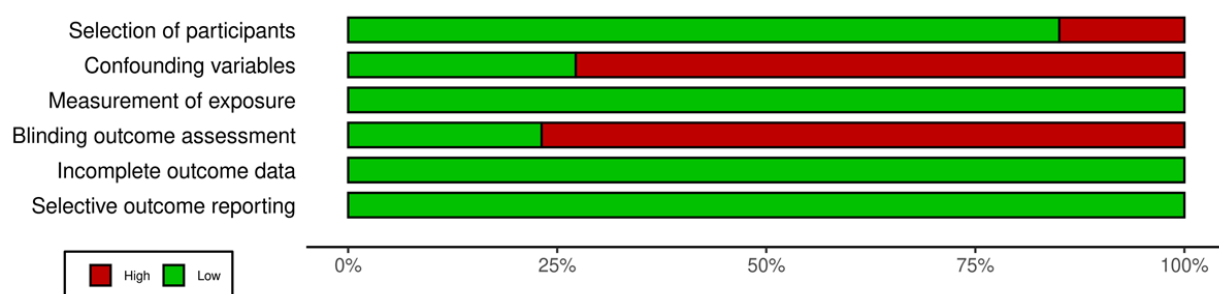

**Figure S1.4.** Overall domain-based risk of bias for GH stiffness.
